# Supplementary material for: Optical and UV Shielding Properties of Inorganic Nanoparticles Embedded in Polymethyl Methacrylate Nanocomposite Freestanding Films
Source: MDPI journal article supplement (doi:10.3390/polym16081048), 2024-04-10
Supplement: s1 [file s1]

# **Optical and UV shielding properties of inorganic nanoparticles embedded PMMA nanocomposite freestanding films**

**A. Kathalingam<sup>a</sup>, Dhanasekaran Vikraman<sup>b</sup>, Du-Hee Lee<sup>b</sup>, Yoon-A Cho<sup>b</sup>, Hyun-Seok Kim<sup>b\*</sup>**

*<sup>a</sup>Millimeter-wave Innovation Technology Research Center, Dongguk University-Seoul, Seoul 04620, Republic of Korea*

*<sup>b</sup>Division of Electronics and Electrical Engineering, Dongguk University-Seoul, Seoul 04620, Republic of Korea*

\*Corresponding author. E-mail address: hyunseokk@dongguk.edu

## **Abstract**

Polymethyl methacrylate (PMMA) is an interesting polymer employed in various applications due its outstanding properties. However, its electrical and mechanical properties can be further improved by incorporating nanoparticles, and in particular PMMA nanocomposite with nanoparticles provide various multifunctional properties. This work reports PMMA nanocomposite preparation and structural and optical characterizations incorporating carbon nanotubes (CNT), TiO<sub>2</sub> nanoparticles and carbon quantum dots (CQD). CNT/PMMA, TiO<sub>2</sub>/PMMA, and CQD/PMMA nanocomposite freestanding films were prepared using a simple solution method. Various properties for the prepared composite films are reported using scanning electron microscopy, X-ray diffraction, photoluminescence, Fourier transform infrared, and UV-Vis spectroscopy. Optical parameters and photocatalytic dye degradation for the films are reported focusing on materials properties. The CNT/PMMA, TiO<sub>2</sub>/PMMA, and CQD/PMMA films

achieved respectively good electrical conductivity, photodegradation, and fluorescence, compared with other composite films.

**Figure S1.** Absorption spectrum of methylene blue dye at different UV exposure with TiO<sub>2</sub> nanoparticles

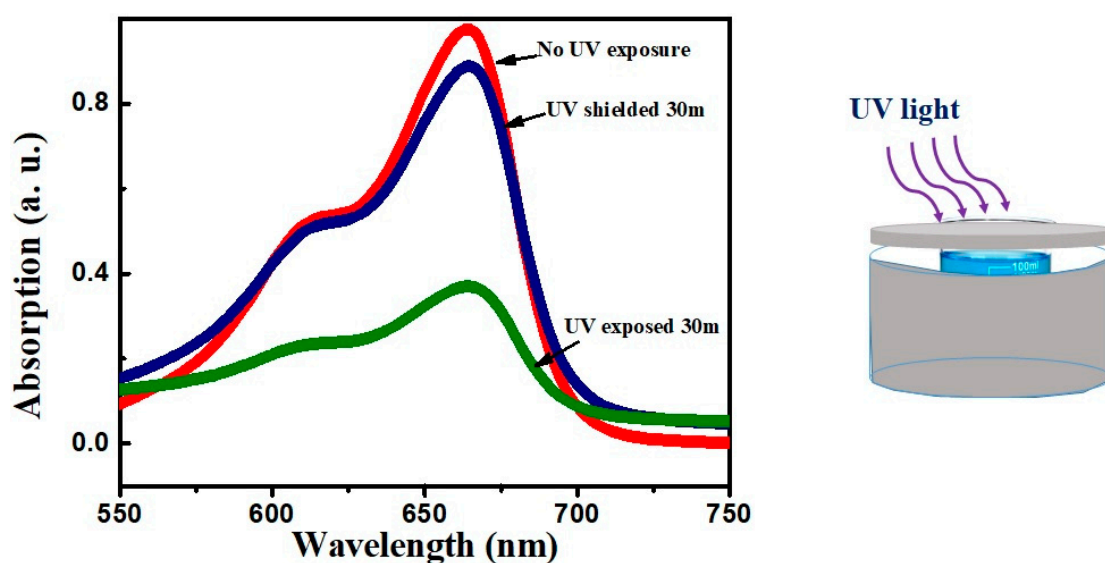

**Figure S2.** Schematic representation of photocatalytic degradation mechanism of TiO<sub>2</sub>/PMMA on MB dye

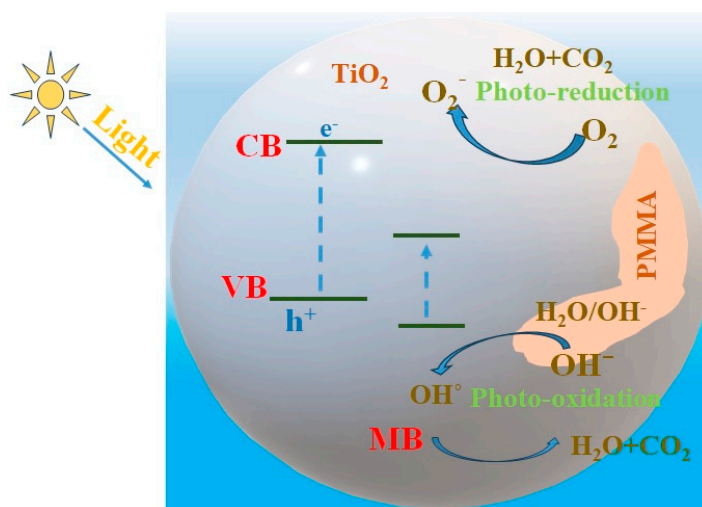

**Table S1.** Comparison of MB dye degradation efficiency of TiO<sub>2</sub>/PMMA films with literature values

| Materials                            | Radiation type | Catalyst concentration              | Time (min) | Efficiency % | Ref          |
|--------------------------------------|----------------|-------------------------------------|------------|--------------|--------------|
| Fe <sub>2</sub> TiO <sub>5</sub>     | Solar light    | 50 mg                               | 240        | 55           | [1]          |
| NDCQDs/ZIF-8                         | Solar light    | -                                   | 180        | 93           | [2]          |
| (CeO <sub>2</sub> -NPs)/GO/PAM       | UV-light       | -                                   | 90         | 90           | [3]          |
| CoZn <sub>5</sub> MgFeO <sub>4</sub> | Solar light    | -                                   | -          | 99           | [4]          |
| rGO@ZnO                              | Solar light    | 20 mg                               | -          | 99           | [5]          |
| MgFe <sub>2</sub> O <sub>4</sub>     | Solar light    | -                                   | 35         | 75           | [6]          |
| MO-PMMA                              | Solar light    | -                                   | 400        | 99           | [7]          |
| TiO <sub>2</sub> /PMMA               | Solar light    | Not applicable<br>Freestanding film | 60         | 40           | Present work |

## References

1. Vasiljevic, Z.; Dojcinovic, M.; Vujancevic, J.; Jankovic-Castvan, I.; Ognjanovic, M.; Tadic, N.; Stojadinovic, S.; Brankovic, G.; Nikolic, M. Photocatalytic degradation of methylene blue under natural sunlight using iron titanate nanoparticles prepared by a modified sol–gel method. *Royal Society open science* **2020**, *7*, 200708.
2. Abd El Khalk, A.A.; Betiha, M.A.; Mansour, A.S.; Abd El Wahed, M.G.; Al-Sabagh, A.M. High degradation of methylene blue using a new nanocomposite based on zeolitic imidazolate framework-8. *ACS omega* **2021**, *6*, 26210-26220.
3. Kalaycıoğlu, Z.; Uysal, B.; Pekcan, Ö.; Erim, F. Efficient photocatalytic degradation of methylene blue dye from aqueous solution with cerium oxide nanoparticles and graphene oxide-doped polyacrylamide. *ACS Omega* **2023**, *8*, 13004–13015.
4. Chahar, D.; Kumar, D.; Thakur, P.; Thakur, A. Visible light induced photocatalytic degradation of methylene blue dye by using Mg doped Co-Zn nanoferrites. *Materials Research Bulletin* **2023**, *162*, 112205.
5. Negash, A.; Mohammed, S.; Weldekirstos, H.D.; Ambaye, A.D.; Gashu, M. Enhanced photocatalytic degradation of methylene blue dye using eco-friendly synthesized rGO@ZnO nanocomposites. *Scientific Reports* **2023**, *13*, 22234.
6. Cabrera, A.; Torres, C.R.; Marchetti, S.; Stewart, S. Degradation of methylene blue dye under dark and visible light conditions in presence of hybrid composites of nanostructured MgFe<sub>2</sub>O<sub>4</sub> ferrites and oxygenated organic compounds. *Journal of Environmental Chemical Engineering* **2020**, *8*, 104274.
7. Rani, M.; Shanker, U. Sun-light driven rapid photocatalytic degradation of methylene blue by poly (methyl methacrylate)/metal oxide nanocomposites. *Colloids and Surfaces A: Physicochemical and Engineering Aspects* **2018**, *559*, 136-147.
